# Supplementary material for: Environmental impact of different scenarios for the pyrolysis of contaminated mixed plastic waste
Source: Royal Society of Chemistry journal article supplement (doi:10.1039/d3gc04396g), 2024-01-01
Supplement: d3gc04396g1.pdf [file d3gc04396g1.pdf]

# Environmental impact of different scenarios for the pyrolysis of contaminated mixed plastic waste

Guillermo Garcia-Garcia<sup>1,2\*</sup>, María Ángeles Martín-Lara<sup>2\*</sup>, Mónica Calero<sup>2</sup>, Gabriel Blázquez<sup>2</sup>

<sup>1</sup> Department of Agrifood Chain Economics, Institute of Agricultural and Fisheries Research and Training (IFAPA), Centre 'Camino de Purchil', 18080 Granada, Spain.

<sup>2</sup> Department of Chemical Engineering, Faculty of Sciences, University of Granada, 18071 Granada, Spain.

\*Corresponding authors: [guillermo.garcia@juntadeandalucia.es](mailto:guillermo.garcia@juntadeandalucia.es) and [marianml@ugr.es](mailto:marianml@ugr.es)

## Supplementary Material

Table S1. Composition of the gas, % m/m

| Scenarios 1, 2 and 3 |       |
|----------------------|-------|
| Hydrogen             | 7.3%  |
| Oxygen               | 0%    |
| Nitrogen             | 0%    |
| Methane              | 49.6% |
| Carbon monoxide      | 2.3%  |
| Ethane               | 11.4% |
| Ethylene             | 8.1%  |

|                 |       |
|-----------------|-------|
| Carbon dioxide  | 6.0%  |
| Acetylene       | 13.1% |
| Propane         | 0%    |
| Methylacetylene | 2.3%  |

*Table S2. Composition of the oil*

|                       |   | <b>Scenarios 1, 2 and 3</b> |
|-----------------------|---|-----------------------------|
| Elemental analysis, % | C | 84.1                        |
|                       | H | 13.4                        |
|                       | N | 0,0                         |
|                       | O | 2.5                         |
| Light Naphtha         |   | 2.2                         |
| Medium naphtha        |   | 3.8                         |
| Heavy naphtha         |   | 33.9                        |
| Kerosene              |   | 16.6                        |
| Distillate Fuel Oil   |   | 13.9                        |
| Light Vacuum Gas Oil  |   | 19.4                        |
| Heavy Vacuum Oil      |   | 10.2                        |

*Table S3. Characteristics of the char*

| <b>Scenario 1</b> | <b>Scenario 2</b> | <b>Scenario 3</b> |
|-------------------|-------------------|-------------------|
|-------------------|-------------------|-------------------|

|                                                 |       |       |        |
|-------------------------------------------------|-------|-------|--------|
| % N                                             | 0.86  | 1.23  | 0.61   |
| % C                                             | 35.62 | 51.17 | 48.96  |
| % H                                             | 2.23  | 0.78  | 0.50   |
| % O                                             | 15.08 | 4.75  | 13.71  |
| % Moisture                                      | 3.16  | 1.80  | 7.20   |
| % Volatile                                      | 27.89 | 8.22  | 9.28   |
| % Ash                                           | 46.21 | 42.07 | 36.22  |
| % Fixed Carbon                                  | 20.81 | 47.91 | 47.30  |
| $S_{\text{BET}}$ ( $\text{m}^2 \text{g}^{-1}$ ) | 14.7  | 100.0 | 939.40 |
| $S_{\text{MP}}$ ( $\text{m}^2 \text{g}^{-1}$ )  | 0.8   | 22.6  | 821.80 |
| $V_{\text{T}}$ ( $\text{cm}^3 \text{g}^{-1}$ )  | 0.025 | 0.209 | 0.65   |
| $V_{\text{MP}}$ ( $\text{cm}^3 \text{g}^{-1}$ ) | 0.0   | 0.011 | 0.40   |
| HHV, $\text{MJ kg}^{-1}$                        | 15.11 | 18.43 | 17.29  |

Table S4. Elemental analysis and Brunauer-Emmett-Teller (BET) area of the commercial activated carbons

|                                               | CARBOSORB NC 1240 <sup>1</sup> | Granular CAC <sup>2</sup> |
|-----------------------------------------------|--------------------------------|---------------------------|
| % C                                           | 92.6                           | 83.17                     |
| % H                                           | 0.35                           | 1.32                      |
| % N                                           | 0.05                           | n.d.                      |
| % S                                           | 1.88                           | 0.07                      |
| % Others                                      | 7                              | 15.51                     |
| $S_{\text{BET}}$ , $\text{m}^2 \text{g}^{-1}$ | 1127                           | 1241                      |

Table S5. Life-cycle inventory for 20 g of mixed plastic waste

| Flow name                 | Scenario 1 | Scenario 2 | Scenario 3 | Unit |
|---------------------------|------------|------------|------------|------|
| Plastic waste             | 20         | 20         | 20         | g    |
| Gas                       | 7.34       | 7.34       | 7.34       | g    |
| Oil                       | 11.34      | 11.34      | 11.34      | g    |
| Char 1                    | 1.32       | 0          | 0          | g    |
| Char 2                    | 0          | 1.32       | 1.32       | g    |
| Air 1                     | 127.5      | 127.5      | 127.5      | g    |
| Combustion gases 1        | 37.09      | 37.09      | 37.09      | g    |
| Carbon dioxide 1          | 18.81      | 18.81      | 18.81      | g    |
| Water vapour 1            | 18.28      | 18.28      | 18.28      | g    |
| Diesel                    | 11.16      | 11.16      | 11.16      | g    |
| Air 2                     | 6.89       | 0          | 0          | g    |
| Combustion gases 2        | 2.43       | 0          | 0          | g    |
| Carbon dioxide 2          | 2.37       | 0          | 0          | g    |
| Water vapour 2            | 0.06       | 0          | 0          | g    |
| Water                     | 0          | 0          | 26.4       | g    |
| Activating carbon dioxide | 0          | 7.4        | 0          | L    |
| Spent carbon dioxide      | 0          | 7.4        | 0          | L    |
| Potassium hydroxide       | 0          | 0          | 0.46       | g    |
| Wastewater                | 0          | 0          | 26.9       | g    |
| Activated carbon          | 0          | 0.46       | 0.46       | g    |
| Electricity 1             | 0.006      | 0.006      | 0.006      | kWh  |
| Electricity 2             | 0          | 0.007      | 0.007      | kWh  |

|        |      |       |       |    |
|--------|------|-------|-------|----|
| Heat 1 | 0.13 | 0.13  | 0.13  | MJ |
| Heat 2 | 0.20 | 0.20  | 0.20  | MJ |
| Heat 3 | 0.21 | 0.21  | 0.21  | MJ |
| Heat 4 | 0.00 | 0.005 | 0.005 | MJ |

Table S6. Products and processes selected from ecoinvent. Note: unit products (U) were used instead of system products (S) to undertake the uncertainty analysis

| Product or process        | Compartment                                      | Data entry in ecoinvent                                                              |
|---------------------------|--------------------------------------------------|--------------------------------------------------------------------------------------|
| Diesel                    | Known outputs to technosphere.                   | Diesel {Europe without Switzerland}  market for   Cut-off, S                         |
|                           | Avoided products                                 |                                                                                      |
| Activated carbon          | Known outputs to technosphere.                   | Activated carbon, granular {GLO}  market for activated carbon, granular   Cut-off, S |
|                           | Avoided products                                 |                                                                                      |
| Air                       | Known inputs from nature (resources)             | Air                                                                                  |
| Water                     | Known inputs from nature (resources)             | Water, unspecified natural origin, ES                                                |
| Potassium hydroxide       | Known inputs from technosphere (materials/fuels) | Potassium hydroxide {GLO}  market for   Cut-off, S                                   |
| Activating carbon dioxide | Known inputs from technosphere                   | Carbon dioxide, liquid {RER}  market for   Cut-off, S                                |

|                                         |                                                         |                                                                                                                                           |                |
|-----------------------------------------|---------------------------------------------------------|-------------------------------------------------------------------------------------------------------------------------------------------|----------------|
|                                         | (materials/fuels)                                       |                                                                                                                                           |                |
|                                         | Known inputs from                                       |                                                                                                                                           |                |
| Electricity                             | technosphere<br>(electricity/heat)                      | Electricity, low voltage {ES}  market for   Cut-off, S                                                                                    |                |
|                                         | Known inputs from                                       |                                                                                                                                           |                |
| Heat                                    | technosphere<br>(electricity/heat)                      | Heat, central or small-scale, natural gas {Europe without Switzerland}  market for heat, central or small-scale, natural gas   Cut-off, S |                |
| Carbon dioxide,<br>Spent carbon dioxide | Emissions to air                                        |                                                                                                                                           | Carbon dioxide |
| Water vapour                            | Emissions to air                                        |                                                                                                                                           | Water          |
| Wastewater                              | Emissions to water                                      |                                                                                                                                           | Water, ES      |
|                                         | Outputs to                                              |                                                                                                                                           |                |
| Landfill                                | technosphere:<br>Waste treatment                        | Waste polypropylene {RoW}  treatment of waste polypropylene, sanitary landfill   Cut-off, S                                               |                |
| Electricity (for sensitivity analysis)  | Known inputs from<br>technosphere<br>(electricity/heat) | Electricity, low voltage {ES}  electricity production, photovoltaic, 570kWp open ground installation, multi-Si   Cut-off, S               |                |

## References

- 1 S. Marzeddu, M. A. Décima, L. Camilli, M. P. Bracciale, V. Genova, L. Paglia, F. Marra, M. Damizia, M. Stoller, A. Chiavola and M. R. Boni, *Materials* 2022, Vol. 15, Page 7162, 2022, **15**, 7162.
- 2 R. Shahrokhi-Shahraki, C. Benally, M. G. El-Din and J. Park, *Chemosphere*, 2021, **264**, 128455.
